# Supplementary material for: Assessing Related Factors of Intention to Perpetrate Dating Violence among University Students Using the Theory of Planned Behavior
Source: MDPI journal article supplement (doi:10.3390/ijerph17030923), 2020-02-02
Supplement: s1 [file s1]

## Supplementary Material

**Table 1.** Items of the 26-item Dating Violence Behavioral Intention Questionnaire (DVBIQ).

| TPB construct                                                                                                                                                                                                                                                                                 | Items /Scoring                                                                                                                                                                                                                                                                                                                                                                                                                                                                                                                  |
|-----------------------------------------------------------------------------------------------------------------------------------------------------------------------------------------------------------------------------------------------------------------------------------------------|---------------------------------------------------------------------------------------------------------------------------------------------------------------------------------------------------------------------------------------------------------------------------------------------------------------------------------------------------------------------------------------------------------------------------------------------------------------------------------------------------------------------------------|
| <b>Direct measures</b>                                                                                                                                                                                                                                                                        | <b>8 items</b>                                                                                                                                                                                                                                                                                                                                                                                                                                                                                                                  |
| Attitude                                                                                                                                                                                                                                                                                      | <ol style="list-style-type: none"> <li>If I have a dating partner, my feeling to physically, mentally, or sexually abuse him/her in the following month is...<br/>1 (Extremely bad) to 7 (Extremely good)</li> <li>In my opinion, physical, mental or sexual violence against a dating partner is...<br/>1(Strongly unacceptable) to 7 (Strongly acceptable)</li> <li>In my opinion, intention to commit physical, mental or sexual violence against a dating partner is...<br/>1(Strongly bad) to 7 (Strongly good)</li> </ol> |
| Subjective norm                                                                                                                                                                                                                                                                               | <ol style="list-style-type: none"> <li>Most of the people who influence me a lot (e.g., parents, friends, and teachers) hold an attitude that physical, mental, or sexual violence against a dating partner are....<br/>1 (Strongly disagree) to 7 (Strongly agree)</li> <li>Most of the people who influence me a lot (e.g., parents, friends, and teachers) think that physical, mental or sexual violence against a dating partner is...<br/>1(Strongly unacceptable) to 7 (Strongly acceptable)</li> </ol>                  |
| Perceived behavior control                                                                                                                                                                                                                                                                    | <ol style="list-style-type: none"> <li>To me, physical, mental, or sexual violence against a dating partner in the following month is...<br/>1 (Strongly not easy) to 7 (Strongly easy)</li> <li>The statement that in the following month I can commit physical, mental or sexual violence against a dating partner if I want is...<br/>1 (Extremely incorrect) to 7 (Extremely correct)</li> </ol>                                                                                                                            |
| Intention                                                                                                                                                                                                                                                                                     | <p>If I have a dating partner, the possibility of me perpetrating DV against him/her in the following month is...</p> <p>1 (Strongly impossible) to 7 (Strongly possible)</p>                                                                                                                                                                                                                                                                                                                                                   |
| <b>Indirect measures</b>                                                                                                                                                                                                                                                                      | <b>18 items ( 9 composite items)</b>                                                                                                                                                                                                                                                                                                                                                                                                                                                                                            |
| <b>Behavioral beliefs</b>                                                                                                                                                                                                                                                                     | <b>Outcome evaluation</b>                                                                                                                                                                                                                                                                                                                                                                                                                                                                                                       |
| <ol style="list-style-type: none"> <li>Physical, mental, or sexual violence against dating partner will make him/her obey me...<br/>1 (Strongly disagree) to 7 (Strongly agree)</li> <li>Physical, mental or sexual violence against the dating partner will release my emotion...</li> </ol> | <ol style="list-style-type: none"> <li>Physical, mental, or sexual violence against a dating partner can make him/her obey me, I feel this is...<br/>1(Strongly bad) to 7 (Strongly good)</li> <li>Physical, mental or sexual violence against a dating partner can make me release my emotion, I feel this is...<br/>1(Strongly bad) to 7 (Strongly good)</li> </ol>                                                                                                                                                           |

| 1 (Strongly disagree) to 7 (Strongly agree)                                                                                                                                                                                                                       |                                                                                                                                                                                                                                                                            |
|-------------------------------------------------------------------------------------------------------------------------------------------------------------------------------------------------------------------------------------------------------------------|----------------------------------------------------------------------------------------------------------------------------------------------------------------------------------------------------------------------------------------------------------------------------|
| Normative beliefs                                                                                                                                                                                                                                                 | Motivation to comply                                                                                                                                                                                                                                                       |
| 1. Most of my family members (e.g., parents, brothers, sisters, etc.) think that physical, mental, or sexual violence against a dating partner is...<br>1 (Strongly unacceptable) to 7 (Strongly acceptable)                                                      | 1. Will I follow my family's (parent, brother, sister) advice if I want to commit physical, mental, or sexual violence against dating partner...?<br>1 (Strongly unwilling to) to 7 (Strongly willing to)                                                                  |
| 2. Most of my teachers think that physical, mental or sexual violence against a dating partner is...<br>1(Strongly unacceptable) to 7 (Strongly acceptable)                                                                                                       | 2. Will I follow my teachers' advice if I want to commit physical, mental or sexual violence against dating partner...?<br>1(Strongly unwilling to) to 7 (Strongly willing to)                                                                                             |
| 3. Most of my classmates or friends think that physical, mental or sexual violence against a dating partner is...<br>1(Strongly unacceptable) to 7 (Strongly acceptable)                                                                                          | 3. Will I follow my classmates' or friends' advice if I want to commit physical, mental or sexual violence against dating partner...?<br>1(Strongly unwilling to) to 7 (Strongly willing to)                                                                               |
| Control beliefs                                                                                                                                                                                                                                                   | Power of control                                                                                                                                                                                                                                                           |
| 1. If the dating partner has a bad attitude (e.g., irresponsibility, disobedience, perfunctoriness, provocation, lying) that will provoke my physical, mental or sexual violence against a dating partner....<br>1 (Strongly possible) to 7 (Strongly impossible) | 1. If the dating partner has a bad attitude (e.g., irresponsibility, disobedience, perfunctoriness, provocation, lying) that will provoke my physical, mental or sexual violence against her/him. I feel this to be...<br>1 (Strongly possible) to 7 (Strongly impossible) |
| 2. If the dating partner hangs out with the person I worry about without informing me, that will provoke my physical, mental or sexual violence against her/him.<br>1 (Strongly possible) to 7 (Strongly impossible)                                              | 2. If the dating partner hangs out with the person I worry about without informing me that will provoke my physical, mental or sexual violence against her/him. I feel this to be...<br>1 (Strongly possible) to 7 (Strongly impossible)                                   |
| 3. If I am unhappy or unable to control my emotion, that will provoke my physical, mental or sexual violence against a dating partner.<br>1 (Strongly possible) to 7 (Strongly impossible)                                                                        | 3. If I am unhappy or unable to control my emotion, that will provoke my physical, mental or sexual violence against a dating partner. I feel this to be...<br>1 (Strongly possible) to 7 (Strongly impossible)                                                            |
| 4. My dating partner's disobedience will provoke my physical, mental or sexual violence against her/him.<br>1 (Strongly possible) to 7 (Strongly impossible)                                                                                                      | 4. My dating partner's disobedience will provoke my physical, mental or sexual violence against her/him. I feel this to be...<br>1 (Strongly possible) to 7 (Strongly impossible)                                                                                          |

Note: TPB: Theory of Planned Behavior; PBC: Perceived behavioral control.
